# Supplementary material
Source: PubMed Central journal article supplement (PMC3582279)
Supplement: Supp_Fig2.pdf [file Supp_Fig2.pdf]

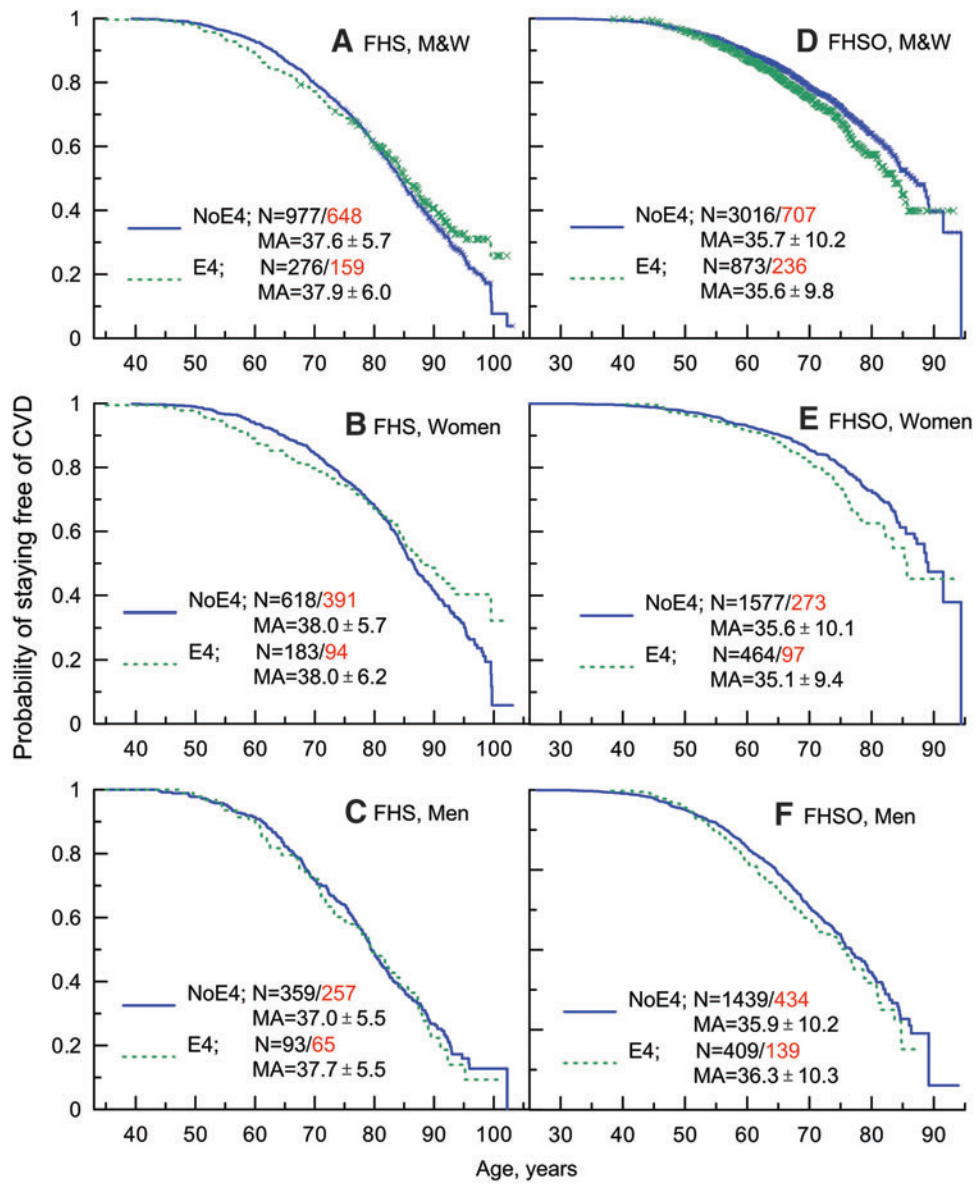

**SUPPLEMENTARY FIG. S2.** Kaplan–Meier age patterns of probability of staying free of cardiovascular disease (CVD) for (A–C) the Framingham Heart Study (FHS) original cohort participants and (D–F) the Framingham Heart Study offspring cohort (FHSO) participants carrying and not carrying the *APOE* e4 allele.  $N = m/k$  denotes the total number of carriers ( $m$ ) and the number of events among them ( $k$ ). MA, Mean age ± standard deviation.
